# Supplementary material for: Host reproductive cycle influences the pouch microbiota of wild southern hairy-nosed wombats (Lasiorhinus latifrons)
Source: Anim Microbiome. 2021 Jan 25;3:13. doi: 10.1186/s42523-021-00074-8 (PMC7836174; doi:10.1186/s42523-021-00074-8)
Supplement: Supplementary file 2 — Additional file 2. [file 42523_2021_74_MOESM2_ESM.xlsx]

## Sheet: SI_Table1_SampleInformation
#SampleID	Sex	Age	Oral_Sample	Skin_Sample	Pouch_Sample	Cloacal_Sample	Faecal_Sample	Milk	Joey_Skin	Joey_Oral	Joey_Clocal	Pouch state	Weight (kg) / BCS	Joey weight / head lenth / sex	Date_Collected
1	Female	Sub_adult	1	1	1	0	0					Dry, clean, shallow	- / 2.5		2019-04-10
3	Female	Sub_adult	1	1	1	0	0					Dry, clean, shallow	14.3 / 2.5		2019-04-10
5	Female	Sub_adult	1	1	1	0	1					Dry, clean, shallow	20.4 / 2		2019-04-10
6	Female	Adult	1	1	1	0	1					Anestrus; dry, dirty, deep	- / -		2019-04-10
8	Female	Sub_adult	1	1	1	0	1					Dry, clean, shallow	20.3 / 2.5		2019-04-10
10	Female	Sub_adult	1	1	1	0	1					Dry, intermediate, shallow	- / 2		2019-04-11
11	Female	Adult	1	1	1	1	1	1	1	1	1	V. moist, dark, dirty, deep	26.8 / 3.5	475g / 72,3 / male	2019-04-11
12	Female	Adult	1	1	1	0	1					Intermediate moist, dirty, deep	- / 2.5		2019-04-12
13	Female	Sub_adult	1	1	1	0	0					Dry, clean, shallow	- / 2.5		2019-04-12
95	Female	Adult	1	0	1	0	1					Cycling, v. moist, dark red, dirty	26.4 / 4		2019-08-30
96	Female	Adult	1	0	1	0	1					Cycling, v. moist, dark red, dirty	25 / 4.5		2019-08-30
97	Female	Adult	1	0	1	0	1					Cycling, v. moist, dark red, dirty	27 / 4.5		2019-08-30
98	Female	Adult	1	0	1	0	0					Cycling, v. moist, dark red, dirty	22.8 / 4		2019-08-30
99	Female	Adult	1	0	1	1	0		1	0	0	V. moist, dark red, dirty	26 / 4.5	- / 16,5 / male	2019-08-30
101	Female	Sub_adult	1	0	1	0	1					Dry, clean, shallow	19.2 / 4		2019-08-30
103	Female	Sub_adult	1	0	1	0	1					Dry, clean, shallow	9.1 / 2		2019-08-30
104	Female	Adult	1	0	1	0	1					Cycling, v. moist, dark, dirty, sensitive around pouch	26.5 / 5		2019-08-31
105	Female	Sub_adult	1	0	1	0	1					Dry, clean, shallow	15.4 / 4		2019-08-31
207	Female	Adult	1	1	1	1	1	1	1	0	1	V. moist, dark red, dirty	26.4 / 4.5	16g / 20 / female	10/29/2019
208	Female	Adult	1	1	1	1	1	1	1	0	0	V. moist, dark red, dirty	23.2 / 3.5	39g / 34,4 / female	10/29/2019
209	Female	Adult	1	1	1	1	1	1	1	1	0	V. moist, dark red, dirty	25 / 4	91 / 36,5 / male	10/29/2019
210	Female	Sub_adult (recapture)	1	1	1	0	0					Dry, clean, shallow	20.3 / 3.5		10/29/2019
213	Female	Sub_adult	1	1	1	0	1					Dry, clean, shallow	19.2 / 3		10/30/2019
214	Female	Adult	1	1	1	0	1					Anestrus; dry, dirty, deep	22.6 / 3.5		10/30/2019
215	Female	Adult	1	1	1	0	1					Dirty, (+ vaginal mucus secretions and mating plug?)	21.5 / 4		10/30/2019
217	Female	Sub_adult	1	1	1	0	1					Dry, clean, shallow	11 / 4		10/30/2019

## Sheet: SI_Table2_decontam.0.5.contamin
FeatureID	freq	prev	p.freq	p.prev	p	contaminant	Kingdom	Phylum	Class	Order	Family	Genus	Species	Confidence
68066927219178bcbd06e2def7e7f5f1	6.82e-05	2	NA	0.195489	0.195489	TRUE	D_0__Bacteria	D_1__Proteobacteria	D_2__Gammaproteobacteria	D_3__Xanthomonadales	D_4__Xanthomonadaceae	NA	NA	1
98bc1ec29a4c0f9fbf70d7bfa48a48b6	7.43e-05	2	NA	0.0185122	0.0185122	TRUE	D_0__Bacteria	D_1__Proteobacteria	D_2__Gammaproteobacteria	D_3__Betaproteobacteriales	D_4__Burkholderiaceae	D_5__Tepidimonas	NA	0.998077
7bae376e41b6259952179d259f069c1e	0.001264	11	NA	2.5e-06	2.5e-06	TRUE	D_0__Bacteria	D_1__Proteobacteria	D_2__Gammaproteobacteria	D_3__Betaproteobacteriales	D_4__Burkholderiaceae	NA	NA	0.999967
dde6d3e36af306c913854a9cf0ddf248	3.55e-05	2	NA	0.0185122	0.0185122	TRUE	D_0__Bacteria	D_1__Proteobacteria	D_2__Gammaproteobacteria	D_3__Betaproteobacteriales	D_4__Burkholderiaceae	D_5__Ralstonia	NA	0.999631
d24a9e0f8d5286888bb74828b569186f	0.000644348	2	NA	0.0185122	0.0185122	TRUE	D_0__Bacteria	D_1__Proteobacteria	D_2__Gammaproteobacteria	D_3__Betaproteobacteriales	D_4__Hydrogenophilaceae	D_5__Hydrogenophilus	NA	1
107aa7e6b56274803bffd1ccff5b2ee6	0.000157215	4	NA	0.097507	0.097507	TRUE	D_0__Bacteria	D_1__Proteobacteria	D_2__Gammaproteobacteria	D_3__Pseudomonadales	D_4__Moraxellaceae	D_5__Acinetobacter	NA	0.997619
50a3b56e0b7db75ee9daccf7a751ba41	0.00272429	8	NA	0.0270558	0.0270558	TRUE	D_0__Bacteria	D_1__Proteobacteria	D_2__Gammaproteobacteria	D_3__Pseudomonadales	D_4__Moraxellaceae	D_5__Acinetobacter	NA	0.999949
c6357b5b5bb8c067c51faad5180b4e99	9.07e-05	4	NA	0.378611	0.378611	TRUE	D_0__Bacteria	D_1__Proteobacteria	D_2__Gammaproteobacteria	D_3__Pseudomonadales	D_4__Moraxellaceae	D_5__Acinetobacter	NA	0.999972
32cfdd0837255fb3842fc282e432ec52	3.61e-05	3	NA	0.289842	0.289842	TRUE	D_0__Bacteria	D_1__Proteobacteria	D_2__Gammaproteobacteria	D_3__Pseudomonadales	D_4__Moraxellaceae	D_5__Acinetobacter	NA	0.999999
f52e34a07ff2e814f50950ea181cb271	0.000374572	6	NA	0.0510576	0.0510576	TRUE	D_0__Bacteria	D_1__Proteobacteria	D_2__Gammaproteobacteria	D_3__Pseudomonadales	D_4__Moraxellaceae	D_5__Acinetobacter	NA	0.999968
cfdd70bdbf090e219bf771ede00b81bb	6e-05	2	NA	0.195489	0.195489	TRUE	D_0__Bacteria	D_1__Proteobacteria	D_2__Gammaproteobacteria	D_3__Pasteurellales	D_4__Pasteurellaceae	D_5__Haemophilus	NA	0.99686
15b888fac2a8be4df2917b6670dad73f	2.99e-05	4	NA	0.378611	0.378611	TRUE	D_0__Bacteria	D_1__Proteobacteria	D_2__Gammaproteobacteria	D_3__Pasteurellales	D_4__Pasteurellaceae	D_5__Aggregatibacter	D_6__uncultured bacterium	0.907064
2080b61bcf1e3d4f144c627746179f8a	0.000387884	13	NA	0.358777	0.358777	TRUE	D_0__Bacteria	D_1__Proteobacteria	D_2__Gammaproteobacteria	D_3__Pasteurellales	D_4__Pasteurellaceae	NA	NA	1
37a90abf181b684611b3eabfd5dfa715	0.000144937	5	NA	0.0281197	0.0281197	TRUE	D_0__Bacteria	D_1__Proteobacteria	D_2__Gammaproteobacteria	D_3__Enterobacteriales	D_4__Enterobacteriaceae	D_5__Proteus	NA	0.992726
8f09bac714c02dc9415770271349dc99	0.129695	74	NA	0.000981973	0.000981973	TRUE	D_0__Bacteria	D_1__Proteobacteria	D_2__Gammaproteobacteria	D_3__Pseudomonadales	D_4__Pseudomonadaceae	D_5__Pseudomonas	NA	0.999929
8cb92babedb9f4ff7bedee4ac4f47370	0.000121149	3	NA	0.052145	0.052145	TRUE	D_0__Bacteria	D_1__Proteobacteria	D_2__Alphaproteobacteria	D_3__Azospirillales	D_4__Azospirillaceae	D_5__Azospirillum	NA	1
c709213e70b1275f0dd0d033f26f0c1a	0.000555398	3	NA	0.00339155	0.00339155	TRUE	D_0__Bacteria	D_1__Proteobacteria	D_2__Alphaproteobacteria	D_3__Sphingomonadales	D_4__Sphingomonadaceae	D_5__Sphingobium	D_6__Sphingobium yanoikuyae	0.796746
bd7c2c1ebe6cb88448966b74fd47ba57	7.12e-05	2	NA	0.195489	0.195489	TRUE	D_0__Bacteria	D_1__Proteobacteria	D_2__Alphaproteobacteria	D_3__Sphingomonadales	D_4__Sphingomonadaceae	D_5__Sphingopyxis	NA	0.997464
861cdaafddd1451cc04791babe066ba7	3.23e-05	2	NA	0.195489	0.195489	TRUE	D_0__Bacteria	D_1__Proteobacteria	D_2__Alphaproteobacteria	D_3__Sphingomonadales	D_4__Sphingomonadaceae	D_5__Novosphingobium	NA	0.992802
1ea83794b96a00695927de44a90aa26d	0.000357585	5	NA	0.4605	0.4605	TRUE	D_0__Bacteria	D_1__Proteobacteria	D_2__Alphaproteobacteria	D_3__Sphingomonadales	D_4__Sphingomonadaceae	D_5__Sphingomonas	NA	1
77c55b0f6c379835576843cf02171325	0.00359812	3	NA	0.289842	0.289842	TRUE	D_0__Bacteria	D_1__Proteobacteria	D_2__Alphaproteobacteria	D_3__Sphingomonadales	D_4__Sphingomonadaceae	D_5__Sphingomonas	NA	0.957396
b192bcf4602268b74f2f47ee1201f7ec	4.97e-05	2	NA	0.195489	0.195489	TRUE	D_0__Bacteria	D_1__Proteobacteria	D_2__Alphaproteobacteria	D_3__Rhizobiales	D_4__Beijerinckiaceae	D_5__Methylobacterium	NA	0.999905
89fbbcbac6cfd82b96f49f9f065125db	8.09e-05	9	NA	0.401093	0.401093	TRUE	D_0__Bacteria	D_1__Proteobacteria	D_2__Alphaproteobacteria	D_3__Caulobacterales	D_4__Caulobacteraceae	D_5__uncultured	NA	0.998659
1369aba02dd8b749b4c4c2a799d34207	0.000366814	2	NA	0.0185122	0.0185122	TRUE	D_0__Bacteria	D_1__Proteobacteria	D_2__Alphaproteobacteria	D_3__Caulobacterales	D_4__Caulobacteraceae	D_5__Brevundimonas	NA	0.999958
1d90d44d83b380b8ef9612950558717e	3.26e-05	3	NA	0.289842	0.289842	TRUE	D_0__Bacteria	D_1__Proteobacteria	D_2__Alphaproteobacteria	D_3__Caulobacterales	D_4__Caulobacteraceae	D_5__Phenylobacterium	NA	0.999995
77d6a7db6de3bb1f15a02fdb36f90627	0.00190055	16	NA	0.00994345	0.00994345	TRUE	D_0__Bacteria	D_1__Proteobacteria	D_2__Alphaproteobacteria	D_3__Rhizobiales	D_4__Xanthobacteraceae	D_5__Bradyrhizobium	NA	0.875247
40fc802ae91cc17389abefc9d5bce560	9.3e-05	4	NA	0.0123661	0.0123661	TRUE	D_0__Bacteria	D_1__Proteobacteria	D_2__Alphaproteobacteria	D_3__Rhizobiales	D_4__Xanthobacteraceae	D_5__Bradyrhizobium	NA	0.825671
7b81d5b62ba21715ea6538c4802278bf	4.33e-05	2	NA	0.195489	0.195489	TRUE	D_0__Bacteria	D_1__Proteobacteria	D_2__Alphaproteobacteria	D_3__Rhizobiales	D_4__Beijerinckiaceae	NA	NA	0.999625
e8b0b2a9ba4525ce95e2fabd215e13ca	0.000868099	3	NA	0.00339155	0.00339155	TRUE	D_0__Bacteria	D_1__Acidobacteria	D_2__Acidobacteriia	D_3__Acidobacteriales	D_4__Acidobacteriaceae (Subgroup 1)	D_5__Granulicella	NA	0.867073
b83edfd057eaf13019d1e7aaf6f1cdfe	0.000277763	2	NA	0.0185122	0.0185122	TRUE	D_0__Bacteria	D_1__Bacteroidetes	D_2__Bacteroidia	D_3__Chitinophagales	D_4__Chitinophagaceae	D_5__uncultured	NA	0.972899
ee02b9d7321d96af270ccd201ba17b6b	0.00200834	2	NA	0.0185122	0.0185122	TRUE	D_0__Bacteria	D_1__Deinococcus-Thermus	D_2__Deinococci	D_3__Thermales	D_4__Thermaceae	D_5__Meiothermus	NA	1
c360a7e1096c42329a5275f02974e44e	2.57e-05	5	NA	0.4605	0.4605	TRUE	D_0__Bacteria	D_1__Actinobacteria	D_2__Actinobacteria	D_3__Micrococcales	D_4__Dermabacteraceae	D_5__Brachybacterium	NA	0.99957
cfeb33d30aa1b73ecca815bc65ff35f0	5.51e-05	2	NA	0.0185122	0.0185122	TRUE	D_0__Bacteria	D_1__Actinobacteria	D_2__Actinobacteria	D_3__Corynebacteriales	D_4__Corynebacteriaceae	D_5__Corynebacterium 1	NA	0.999991
5aa8281fbf9be4bfbf7ac852f1bdf8fe	0.000100914	2	NA	0.195489	0.195489	TRUE	D_0__Bacteria	D_1__Actinobacteria	D_2__Actinobacteria	D_3__Corynebacteriales	D_4__Corynebacteriaceae	D_5__Corynebacterium	NA	0.999768
8bc54d575f88d09b2ba16b7f571812ae	0.000261222	7	NA	0.273786	0.273786	TRUE	D_0__Bacteria	D_1__Actinobacteria	D_2__Actinobacteria	D_3__Corynebacteriales	D_4__Corynebacteriaceae	D_5__Corynebacterium 1	NA	0.95838
1189d4ef3af60ba943cc73161a4097a9	5.49e-06	2	NA	0.195489	0.195489	TRUE	D_0__Bacteria	D_1__Actinobacteria	D_2__Actinobacteria	D_3__Corynebacteriales	D_4__Corynebacteriaceae	D_5__Corynebacterium 1	NA	0.995798
e63ec506c980189578bb1743acc9009e	0.000216601	3	NA	0.289842	0.289842	TRUE	D_0__Bacteria	D_1__Actinobacteria	D_2__Actinobacteria	D_3__Corynebacteriales	D_4__Corynebacteriaceae	D_5__Corynebacterium 1	NA	0.836598
8253a32e37cc65a796a92ee67b50d870	0.000215378	3	NA	0.289842	0.289842	TRUE	D_0__Bacteria	D_1__Actinobacteria	D_2__Actinobacteria	D_3__Corynebacteriales	D_4__Corynebacteriaceae	D_5__Lawsonella	D_6__uncultured bacterium	0.941342
6c891abaa8f2147383dd332e601800eb	0.00189658	4	NA	0.378611	0.378611	TRUE	D_0__Bacteria	D_1__Actinobacteria	D_2__Actinobacteria	D_3__Micrococcales	D_4__Micrococcaceae	D_5__Micrococcus	NA	0.999507
cff9a22fbe84aa51b4d11e00a8615d22	3.9e-05	3	NA	0.289842	0.289842	TRUE	D_0__Bacteria	D_1__Actinobacteria	D_2__Actinobacteria	D_3__Micrococcales	D_4__Microbacteriaceae	NA	NA	0.998774
2f7313462962aae2b366b8adfec1aa40	0.000167946	4	NA	0.378611	0.378611	TRUE	D_0__Bacteria	D_1__Actinobacteria	D_2__Actinobacteria	D_3__Frankiales	D_4__Geodermatophilaceae	D_5__Geodermatophilus	D_6__uncultured bacterium	0.93641
451922ef5ed72e9dcbc727caaadc2d32	9.27e-06	2	NA	0.195489	0.195489	TRUE	D_0__Bacteria	D_1__Actinobacteria	D_2__Actinobacteria	D_3__Propionibacteriales	D_4__Nocardioidaceae	D_5__Aeromicrobium	D_6__Aeromicrobium erythreum	0.720804
d8b49d4182a43d0afd756686ef355061	0.00188331	4	NA	0.000600043	0.000600043	TRUE	D_0__Bacteria	D_1__Actinobacteria	D_2__Rubrobacteria	D_3__Rubrobacterales	D_4__Rubrobacteriaceae	D_5__Rubrobacter	NA	1
23106b884cbd27eac0a12bbde520cd96	5.07e-05	2	NA	0.0185122	0.0185122	TRUE	D_0__Bacteria	D_1__Actinobacteria	D_2__Thermoleophilia	D_3__Solirubrobacterales	D_4__Solirubrobacteraceae	D_5__Solirubrobacter	D_6__uncultured bacterium	0.86434
e1807bab3b0448e37f0ca65600fe79fe	4.99e-05	2	NA	0.195489	0.195489	TRUE	D_0__Bacteria	D_1__Actinobacteria	D_2__MB-A2-108	D_3__uncultured actinobacterium	D_4__uncultured actinobacterium	D_5__uncultured actinobacterium	D_6__uncultured actinobacterium	0.999964
a53834cfb9d92bd1688d456498c75cdd	5.58e-05	4	NA	0.378611	0.378611	TRUE	D_0__Bacteria	D_1__Cyanobacteria	D_2__Oxyphotobacteria	D_3__Chloroplast	NA	NA	NA	1
4adf7f8997ae5b9c13876aa73021db7b	1.84e-05	2	NA	0.195489	0.195489	TRUE	D_0__Bacteria	D_1__Firmicutes	D_2__Bacilli	D_3__Bacillales	D_4__Paenibacillaceae	D_5__Brevibacillus	D_6__uncultured bacterium	0.997654
823198bad85b8879345b7e95baec6657	3.67e-05	4	NA	0.378611	0.378611	TRUE	D_0__Bacteria	D_1__Firmicutes	D_2__Bacilli	D_3__Bacillales	NA	NA	NA	0.999961
5b29df8b5b26c111a279f57fd53e7b8e	0.00100372	3	NA	0.00339155	0.00339155	TRUE	D_0__Bacteria	D_1__Firmicutes	D_2__Bacilli	D_3__Bacillales	D_4__Bacillaceae	D_5__Anoxybacillus	NA	0.943345
a5d1217aa1cbc154c499796f9040d954	8.09e-05	3	NA	0.289842	0.289842	TRUE	D_0__Bacteria	D_1__Firmicutes	D_2__Bacilli	D_3__Bacillales	D_4__Staphylococcaceae	D_5__Staphylococcus	NA	0.999942
d23fbef2f31d48eda40876cdbc49933a	0.00217416	10	NA	0.000220731	0.000220731	TRUE	D_0__Bacteria	D_1__Firmicutes	D_2__Bacilli	D_3__Bacillales	D_4__Staphylococcaceae	D_5__Staphylococcus	NA	0.999998
241e6db38c8a8f5e46e9ba4000cd0075	2.54e-05	4	NA	0.378611	0.378611	TRUE	D_0__Bacteria	D_1__Firmicutes	D_2__Bacilli	D_3__Lactobacillales	D_4__Aerococcaceae	NA	NA	0.724077
07acc67e638f99d832e8e88c079c0745	0.00019076	5	NA	0.4605	0.4605	TRUE	D_0__Bacteria	D_1__Firmicutes	D_2__Bacilli	D_3__Lactobacillales	D_4__Streptococcaceae	D_5__Streptococcus	D_6__uncultured methanogenic archaeon	0.92253
bd2ebc70501f7d867c204f94c4e483da	0.000294529	2	NA	0.0185122	0.0185122	TRUE	D_0__Bacteria	D_1__Firmicutes	D_2__Bacilli	D_3__Lactobacillales	D_4__Streptococcaceae	D_5__Streptococcus	NA	1
a5189f77a2cfeab3bc1602ff5c8ac3e9	0.000181477	8	NA	0.000369916	0.000369916	TRUE	D_0__Bacteria	D_1__Firmicutes	D_2__Bacilli	D_3__Lactobacillales	D_4__Streptococcaceae	D_5__Streptococcus	NA	0.999876
b8495e837dc3a46d8d498e36355c518b	8.13e-05	9	NA	0.401093	0.401093	TRUE	D_0__Bacteria	D_1__Firmicutes	D_2__Erysipelotrichia	D_3__Erysipelotrichales	D_4__Erysipelotrichaceae	D_5__uncultured	NA	0.993153
4ab2eb64e69d6b22da2ac109f1bf5bd4	6.04e-05	3	NA	0.289842	0.289842	TRUE	D_0__Bacteria	D_1__Firmicutes	D_2__Clostridia	D_3__Clostridiales	D_4__Family XI	D_5__Helcococcus	D_6__uncultured bacterium	0.775053
54badef6a81897cbdcfe5a3b606d2757	6.45e-06	5	NA	0.4605	0.4605	TRUE	D_0__Bacteria	D_1__Firmicutes	D_2__Clostridia	D_3__Clostridiales	D_4__Ruminococcaceae	D_5__Ruminococcaceae UCG-014	NA	1
0aa2897f168bd3b7edcdbd7b7c1b9f40	0.000155961	5	NA	0.4605	0.4605	TRUE	D_0__Bacteria	D_1__Firmicutes	D_2__Clostridia	D_3__Clostridiales	D_4__Clostridiaceae 1	D_5__Proteiniclasticum	D_6__uncultured bacterium	0.9986
6d59e45524751443fb12c13822f06712	5.4e-05	2	NA	0.195489	0.195489	TRUE	D_0__Bacteria	D_1__Firmicutes	D_2__Clostridia	D_3__Clostridiales	D_4__Clostridiaceae 1	D_5__Clostridium sensu stricto 1	NA	0.999988

## Sheet: SI_Table_3_FeatureRichness-krus
Group 1	Group 2	H	p-value	q-value
Cloaca (n=5)	Faecal (n=17)	11.087	0.00086937	0.00187249
Cloaca (n=5)	Joey (n=9)	9.12027	0.00252793	0.00404928
Cloaca (n=5)	Milk (n=4)	6	0.0143059	0.0190745
Cloaca (n=5)	Oral (n=26)	5.33904	0.020853	0.0253863
Cloaca (n=5)	Pouch (adult) (n=14)	3.4346	0.0638442	0.0715055
Cloaca (n=5)	Pouch (subadult) (n=12)	6.94444	0.00840799	0.0117712
Cloaca (n=5)	Skin (n=17)	11.087	0.00086937	0.00187249
Faecal (n=17)	Joey (n=9)	17.0349	3.66982e-05	0.000134831
Faecal (n=17)	Milk (n=4)	9.27273	0.00232591	0.00404928
Faecal (n=17)	Oral (n=26)	27.477	1.58972e-07	2.22561e-06
Faecal (n=17)	Pouch (adult) (n=14)	16.3995	5.12996e-05	0.000143639
Faecal (n=17)	Pouch (subadult) (n=12)	9.06667	0.00260311	0.00404928
Faecal (n=17)	Skin (n=17)	20.204	6.96089e-06	4.87262e-05
Joey (n=9)	Milk (n=4)	3.48603	0.0618887	0.0715055
Joey (n=9)	Oral (n=26)	19.5246	9.93119e-06	5.56147e-05
Joey (n=9)	Pouch (adult) (n=14)	0.291751	0.5891	0.5891
Joey (n=9)	Pouch (subadult) (n=12)	14.7849	0.000120498	0.000306722
Joey (n=9)	Skin (n=17)	17.0349	3.66982e-05	0.000134831
Milk (n=4)	Oral (n=26)	5.38068	0.020361	0.0253863
Milk (n=4)	Pouch (adult) (n=14)	0.723297	0.395064	0.409696
Milk (n=4)	Pouch (subadult) (n=12)	7.11765	0.00763288	0.0112485
Milk (n=4)	Skin (n=17)	9.27273	0.00232591	0.00404928
Oral (n=26)	Pouch (adult) (n=14)	9.38312	0.00218993	0.00404928
Oral (n=26)	Pouch (subadult) (n=12)	16.6721	4.44287e-05	0.000138223
Oral (n=26)	Skin (n=17)	29.871	4.61763e-08	1.29294e-06
Pouch (adult) (n=14)	Pouch (subadult) (n=12)	16.9428	3.85231e-05	0.000134831
Pouch (adult) (n=14)	Skin (n=17)	21.2102	4.11561e-06	3.84124e-05
Pouch (subadult) (n=12)	Skin (n=17)	2.54118	0.110912	0.119444

## Sheet: SI_Table_4_UW_UniFrac_anosim-pa
Group 1	Group 2	Sample size	Permutations	R	p-value	q-value
Cloaca	Faecal	22	999	1	0.001	0.00147368
Cloaca	Joey	14	999	1	0.001	0.00147368
Cloaca	Milk	9	999	0.9125	0.005	0.00583333
Cloaca	Oral	31	999	0.737865	0.001	0.00147368
Cloaca	Pouch (adult)	19	999	0.567751	0.001	0.00147368
Cloaca	Pouch (subadult)	17	999	0.689912	0.002	0.00243478
Cloaca	Skin	22	999	0.995649	0.001	0.00147368
Faecal	Joey	26	999	1	0.001	0.00147368
Faecal	Milk	21	999	1	0.002	0.00243478
Faecal	Oral	43	999	0.999902	0.001	0.00147368
Faecal	Pouch (adult)	31	999	0.894347	0.001	0.00147368
Faecal	Pouch (subadult)	29	999	0.818288	0.001	0.00147368
Faecal	Skin	34	999	0.81867	0.001	0.00147368
Joey	Milk	13	999	0.435185	0.027	0.03024
Joey	Oral	35	999	0.820513	0.001	0.00147368
Joey	Pouch (adult)	23	999	-0.108111	0.992	0.992
Joey	Pouch (subadult)	21	999	0.936638	0.001	0.00147368
Joey	Skin	26	999	1	0.001	0.00147368
Milk	Oral	30	999	0.794794	0.002	0.00243478
Milk	Pouch (adult)	18	999	0.0522828	0.319	0.343538
Milk	Pouch (subadult)	16	999	0.803241	0.002	0.00243478
Milk	Skin	21	999	1	0.001	0.00147368
Oral	Pouch (adult)	40	999	0.756644	0.001	0.00147368
Oral	Pouch (subadult)	38	999	0.935422	0.001	0.00147368
Oral	Skin	43	999	0.978033	0.001	0.00147368
Pouch (adult)	Pouch (subadult)	26	999	0.707006	0.001	0.00147368
Pouch (adult)	Skin	31	999	0.813275	0.001	0.00147368
Pouch (subadult)	Skin	29	999	0.00359154	0.425	0.440741

## Sheet: SI_Table_5_permdisp-pairwise
Group 1	Group 2	Sample size	Permutations	F-value	p-value	q-value
Cloaca	Faecal	22	999	11.5658	0.001	0.007
Cloaca	Joey	14	999	0.950362	0.279	0.372
Cloaca	Milk	9	999	17.8509	0.043	0.100333
Cloaca	Oral	31	999	0.0349012	0.909	0.909
Cloaca	Pouch (adult)	19	999	3.79106	0.1	0.199733
Cloaca	Pouch (subadult)	17	999	0.785824	0.344	0.437818
Cloaca	Skin	22	999	2.13662	0.185	0.272632
Faecal	Joey	26	999	26.093	0.004	0.0186667
Faecal	Milk	21	999	82.4941	0.001	0.007
Faecal	Oral	43	999	1.31108	0.165	0.256667
Faecal	Pouch (adult)	31	999	25.7731	0.001	0.007
Faecal	Pouch (subadult)	29	999	9.62292	0.005	0.02
Faecal	Skin	34	999	37.0643	0.001	0.007
Joey	Milk	13	999	8.90754	0.007	0.0217778
Joey	Oral	35	999	0.537231	0.506	0.590333
Joey	Pouch (adult)	23	999	4.6081	0.05	0.107692
Joey	Pouch (subadult)	21	999	0.504725	0.206	0.2884
Joey	Skin	26	999	0.426381	0.437	0.532
Milk	Oral	30	999	2.5615	0.149	0.245412
Milk	Pouch (adult)	18	999	0.119612	0.719	0.74563
Milk	Pouch (subadult)	16	999	0.351576	0.599	0.67088
Milk	Skin	21	999	5.493	0.002	0.0112
Oral	Pouch (adult)	40	999	8.91988	0.011	0.028
Oral	Pouch (subadult)	38	999	2.04609	0.145	0.245412
Oral	Skin	43	999	1.86425	0.107	0.199733
Pouch (adult)	Pouch (subadult)	26	999	1.50302	0.006	0.021
Pouch (adult)	Skin	31	999	5.96211	0.009	0.0252
Pouch (subadult)	Skin	29	999	0.33631	0.624	0.672

## Sheet: SI_Table_6_Shannon_kruskal-wall
Group 1	Group 2	H	p-value	q-value
Pouch (anoestrus) (n=2)	Pouch (cycling) (n=6)	4	0.0455003	0.113149
Pouch (anoestrus) (n=2)	Pouch (lactating) (n=5)	3.75	0.0528075	0.113149
Pouch (anoestrus) (n=2)	Pouch (post lactation) (n=1)	1.5	0.220671	0.254621
Pouch (anoestrus) (n=2)	Pouch (subadult) (n=12)	3.33333	0.0678892	0.113149
Pouch (anoestrus) (n=2)	Skin (n=17)	5.1	0.0239258	0.0717775
Pouch (cycling) (n=6)	Pouch (lactating) (n=5)	3.33333	0.0678892	0.113149
Pouch (cycling) (n=6)	Pouch (post lactation) (n=1)	2.25	0.133614	0.185359
Pouch (cycling) (n=6)	Pouch (subadult) (n=12)	9.55263	0.00199663	0.00998315
Pouch (cycling) (n=6)	Skin (n=17)	12.75	0.000356009	0.00534014
Pouch (lactating) (n=5)	Pouch (post lactation) (n=1)	2.14286	0.143235	0.185359
Pouch (lactating) (n=5)	Pouch (subadult) (n=12)	6.94444	0.00840799	0.03153
Pouch (lactating) (n=5)	Skin (n=17)	11.087	0.00086937	0.00652028
Pouch (post lactation) (n=1)	Pouch (subadult) (n=12)	1.14286	0.285049	0.30541
Pouch (post lactation) (n=1)	Skin (n=17)	2.08978	0.148287	0.185359
Pouch (subadult) (n=12)	Skin (n=17)	0.282353	0.595163	0.595163

## Sheet: SI_Table_7_Unweighted_UniFrac_a
Group 1	Group 2	Sample size	Permutations	R	p-value	q-value
Pouch (anoestrus)	Pouch (cycling)	8	999	1	0.036	0.09
Pouch (anoestrus)	Pouch (lactating)	7	999	0.981818	0.048	0.09
Pouch (anoestrus)	Pouch (post lactation)	3	999	1	0.328	0.447273
Pouch (anoestrus)	Pouch (subadult)	14	999	0.563433	0.042	0.09
Pouch (anoestrus)	Skin	19	999	0.954058	0.003	0.009
Pouch (cycling)	Pouch (lactating)	11	999	-0.008	0.452	0.521538
Pouch (cycling)	Pouch (post lactation)	7	999	1	0.134	0.223333
Pouch (cycling)	Pouch (subadult)	18	999	0.957476	0.001	0.00375
Pouch (cycling)	Skin	23	999	1	0.001	0.00375
Pouch (lactating)	Pouch (post lactation)	6	999	1	0.159	0.2385
Pouch (lactating)	Pouch (subadult)	17	999	0.911404	0.001	0.00375
Pouch (lactating)	Skin	22	999	1	0.001	0.00375
Pouch (post lactation)	Pouch (subadult)	13	999	-0.232323	0.686	0.735
Pouch (post lactation)	Skin	18	999	-0.203287	0.77	0.77
Pouch (subadult)	Skin	29	999	0.00218404	0.382	0.4775

## Sheet: SI_Table_8_permdisp-pairwise
Group 1	Group 2	Sample size	Permutations	F-value	p-value	q-value
Pouch (anoestrus)	Pouch (cycling)	8	999	0.0922939	0.592	1
Pouch (anoestrus)	Pouch (lactating)	7	999	0.0762655	0.657	1
Pouch (anoestrus)	Pouch (post lactation)	3	999	inf	1	1
Pouch (anoestrus)	Pouch (subadult)	14	999	0.215489	0.635	1
Pouch (anoestrus)	Skin	19	999	0.502108	0.762	1
Pouch (cycling)	Pouch (lactating)	11	999	0.00067799	0.979	1
Pouch (cycling)	Pouch (post lactation)	7	999	5.95993	0.252	1
Pouch (cycling)	Pouch (subadult)	18	999	0.100606	0.627	1
Pouch (cycling)	Skin	23	999	3.3401e-06	0.995	1
Pouch (lactating)	Pouch (post lactation)	6	999	5.47025	0.314	1
Pouch (lactating)	Pouch (subadult)	17	999	0.101479	0.68	1
Pouch (lactating)	Skin	22	999	0.00220385	0.968	1
Pouch (post lactation)	Pouch (subadult)	13	999	5.0867	0.545	1
Pouch (post lactation)	Skin	18	999	33.9702	0.514	1
Pouch (subadult)	Skin	29	999	0.330601	0.579	1
